# Supplementary material for: Changes in the Phytochemical Profile and Antioxidant Properties of Prunus persica Fruits after the Application of a Commercial Biostimulant Based on Seaweed and Yeast Extract
Source: MDPI journal article supplement (doi:10.3390/ijms232415911), 2022-12-14
Supplement: s1 [file s1]

**Supplementary Table S1:** Covariance matrix of PCA1 and PCA2 components for Sugar Time variety used for plotting Figure 7, Panel A.

|                      | PCA1   | PCA2   |
|----------------------|--------|--------|
| Pulp_TPC             | 0,909  | 0,415  |
| Pulp_TFC             | 0,937  | -0,229 |
| Pulp_TCrC            | -0,369 | 0,911  |
| Pulp_ABTS            | 0,931  | 0,307  |
| Pulp_DPPH            | 0,964  | 0,257  |
| Pulp_FRAP            | 0,986  | -0,167 |
| Pulp_DMyr3Oglu       | -0,556 | -0,095 |
| Pulp_Cat             | -0,330 | -0,925 |
| Pulp_Nar7Orutinoside | 0,166  | 0,968  |
| Pulp_dPACA           | 0,864  | 0,156  |
| Pulp_Epicat          | 0,349  | 0,725  |
| Pulp_Kae3Oglucur     | 0,867  | -0,076 |
| Pulp_Kae3Ogala       | 0,574  | -0,783 |
| Pulp_Lut7Oglucur     | 0,713  | 0,674  |
| Pulp_Kae3Orham       | 0,722  | 0,672  |
| Pulp_dPACB           | 0,829  | 0,532  |
| Pulp_Nar7Oglu        | 0,733  | 0,675  |
| Pulp_Nar7Oglucur     | -0,113 | -0,344 |
| Pulp_Catdglu         | -0,498 | -0,797 |
| Pulp_Hesp            | 0,463  | -0,869 |
| Pulp_Eri7Orut        | 0,472  | -0,821 |
| Pulp_Lut7Orut        | 0,843  | -0,264 |
| Pulp_Quer3Orut       | 0,909  | -0,153 |
| Pulp_Eri7Oneohes     | -0,807 | 0,307  |
| Pulp_Quer3Ogala      | 0,053  | 0,374  |
| Pulp_Quer3Oglu       | -0,309 | 0,294  |
| Pulp_Dquer3Ogala     | 0,632  | -0,764 |
| Pulp_DQuer3Oglu      | -0,617 | -0,780 |
| Pulp_Hesp7Orut       | -0,214 | 0,921  |
| Pulp_Quer            | -0,349 | 0,868  |
| Pulp_Kae             | 0,725  | 0,667  |
| Pulp_Mquer           | 0,869  | -0,240 |
| Pulp_Eri7Oglu        | 0,483  | -0,853 |
| Pulp_Nar             | -0,536 | 0,629  |
| Pulp_Isorhamn3Orut   | -0,866 | 0,154  |
| Pulp_tPACA           | 0,965  | -0,193 |
| Peel_TPC             | 0,986  | -0,002 |
| Peel_TAC             | 0,991  | 0,132  |
| Peel_TFC             | 0,901  | 0,383  |
| Peel_TCrC            | 0,599  | -0,356 |
| Peel_TF3C            | 0,914  | 0,343  |
| Peel_ABTS            | 0,956  | 0,288  |
| Peel_DPPH            | 0,942  | 0,324  |
| Peel_FRAP            | 0,898  | 0,429  |
| Peel_DMyr3Oglu       | 0,719  | 0,694  |
| Peel_Cat             | 0,661  | 0,740  |
