# Supplementary material for: Changes in the Phytochemical Profile and Antioxidant Properties of Prunus persica Fruits after the Application of a Commercial Biostimulant Based on Seaweed and Yeast Extract
Source: MDPI journal article supplement (doi:10.3390/ijms232415911), 2022-12-14
Supplement: s1 [file s1]

**Supplementary Table S2:** Covariance matrix of PCA1 and PCA2 components for West Rose variety used for plotting Figure 7, Panel B.

|                      | PCA1   | PCA2   |
|----------------------|--------|--------|
| Pulp_TPC             | 0.957  | -0.195 |
| Pulp_TFC             | 0.994  | -0.107 |
| Pulp_TCrC            | 0.458  | 0.66   |
| Pulp_ABTS            | 0.92   | -0.026 |
| Pulp_DPPH            | 0.869  | 0.127  |
| Pulp_FRAP            | 0.917  | -0.394 |
| Pulp_DMyr3Oglu       | 0.448  | 0.616  |
| Pulp_Cat             | -0.037 | -0.567 |
| Pulp_Nar7Orutinoside | -0.834 | -0.188 |
| Pulp_dPACA           | 0.653  | 0.736  |
| Pulp_Epicat          | 0.902  | -0.363 |
| Pulp_Kae3Oglu        | 0.977  | 0.091  |
| Pulp_Kae3Oglucur     | 0.613  | 0.622  |
| Pulp_Kae3Ogala       | 0.998  | 0.024  |
| Pulp_Lut7Oglucur     | 0.446  | 0.812  |
| Pulp_Kae3Orham       | 0.391  | 0.658  |
| Pulp_dPACB           | 0.694  | 0.42   |
| Pulp_Nar7Oglu        | 0.978  | -0.205 |
| Pulp_Hesp            | 0.783  | -0.106 |
| Pulp_Eri7Orut        | 0.328  | -0.132 |
| Pulp_Quer3Orut       | 0.587  | 0.775  |
| Pulp_Quer3Ogala      | -0.22  | 0.974  |
| Pulp_Quer3Oglu       | -0.718 | 0.471  |
| Pulp_Dquer3Ogala     | 0.623  | 0.687  |
| Pulp_DMyr            | 0.993  | 0.044  |
| Pulp_Quer            | 0.394  | -0.413 |
| Pulp_Lut             | -0.761 | -0.17  |
| Pulp_Kae             | 0.69   | -0.631 |
| Peel_TPC             | 0.858  | 0.295  |
| Peel_TFC             | 0.009  | 0.859  |
| Peel_TCrC            | 0.966  | -0.183 |
| Peel_TF3C            | 0.836  | 0.546  |
| Peel_ABTS            | 0.999  | 0.048  |
| Peel_DPPH            | 0.972  | 0.18   |
| Peel_FRAP            | 0.979  | 0.155  |
| Peel_DMyr3Oglu       | 0.206  | 0.685  |
| Peel_Cat             | 0.893  | -0.442 |
| Peel_dPACA           | -0.235 | 0.816  |
| Peel_Epicat          | 0.993  | 0.06   |
| Peel_Lut7Orham       | 0.974  | -0.226 |
| Peel_Kae3Oglucur     | 0.838  | -0.498 |
| Peel_Kae3Ogala       | 0.839  | -0.426 |
| Peel_Lut7Oglucur     | 0.99   | -0.041 |
| Peel_Kae3Orham       | -0.091 | -0.965 |
| Peel_dPACB           | 0.123  | 0.986  |
| Peel_Nar7Oglu        | 0.979  | -0.205 |
